# Supplementary material
Source: publisher figshare collection journal article supplement (https://frontiersin.figshare.com/ndownloader/files/15815279)
Supplement: Supplementary file [file 15815279]

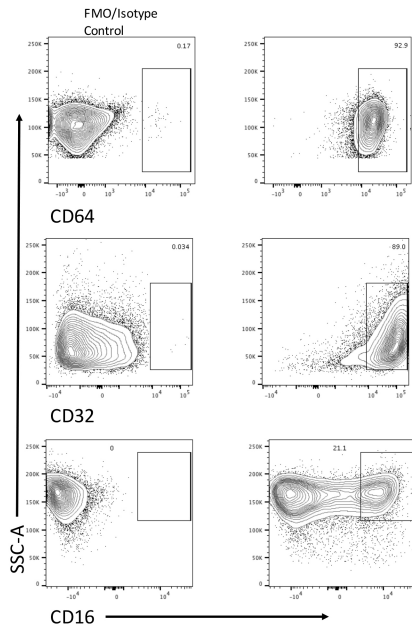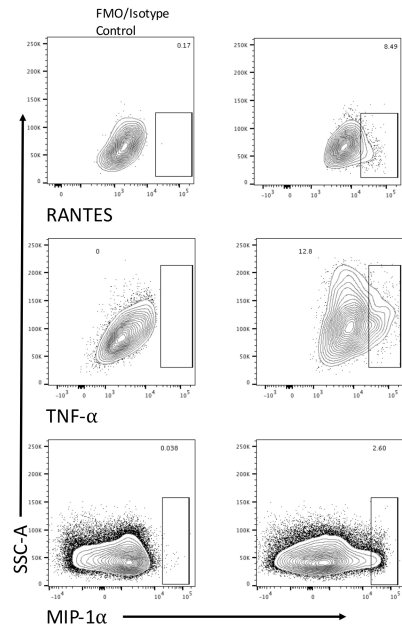

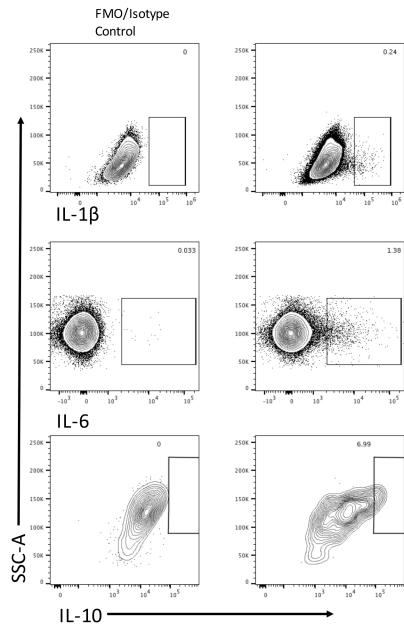

Figure S1. FMO and Isotype controls used to identify positive AM populations

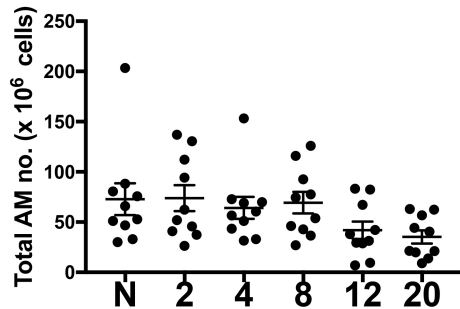

**Figure S2. AM count over the course of SIV infection.** AM count was calculated as AM frequency (% of leukocytes) X cell count. n = 10
